# Supplementary material
Source: PubMed Central journal article supplement (PMC2409414)
Supplement: 0802993105_Supplemental_PDF.pdf [file 0802993105_Supplemental_PDF.pdf]

# Supporting Information

Kim *et al.* 10.1073/pnas.0802993105

## SI Materials and Methods: Electron Microscopy

Aliquots of fibrillized A $\beta$ 40 solution were diluted by a factor of 10–20 and adsorbed onto 300-mesh carbon-coated copper grids, stained with 1% aqueous uranyl nitrate, and visualized with a JOEL 100CX transmission electron microscope. Images were captured with a digital camera (Hamamatsu) using AMT software. See [Figs. S1 and S2](#).

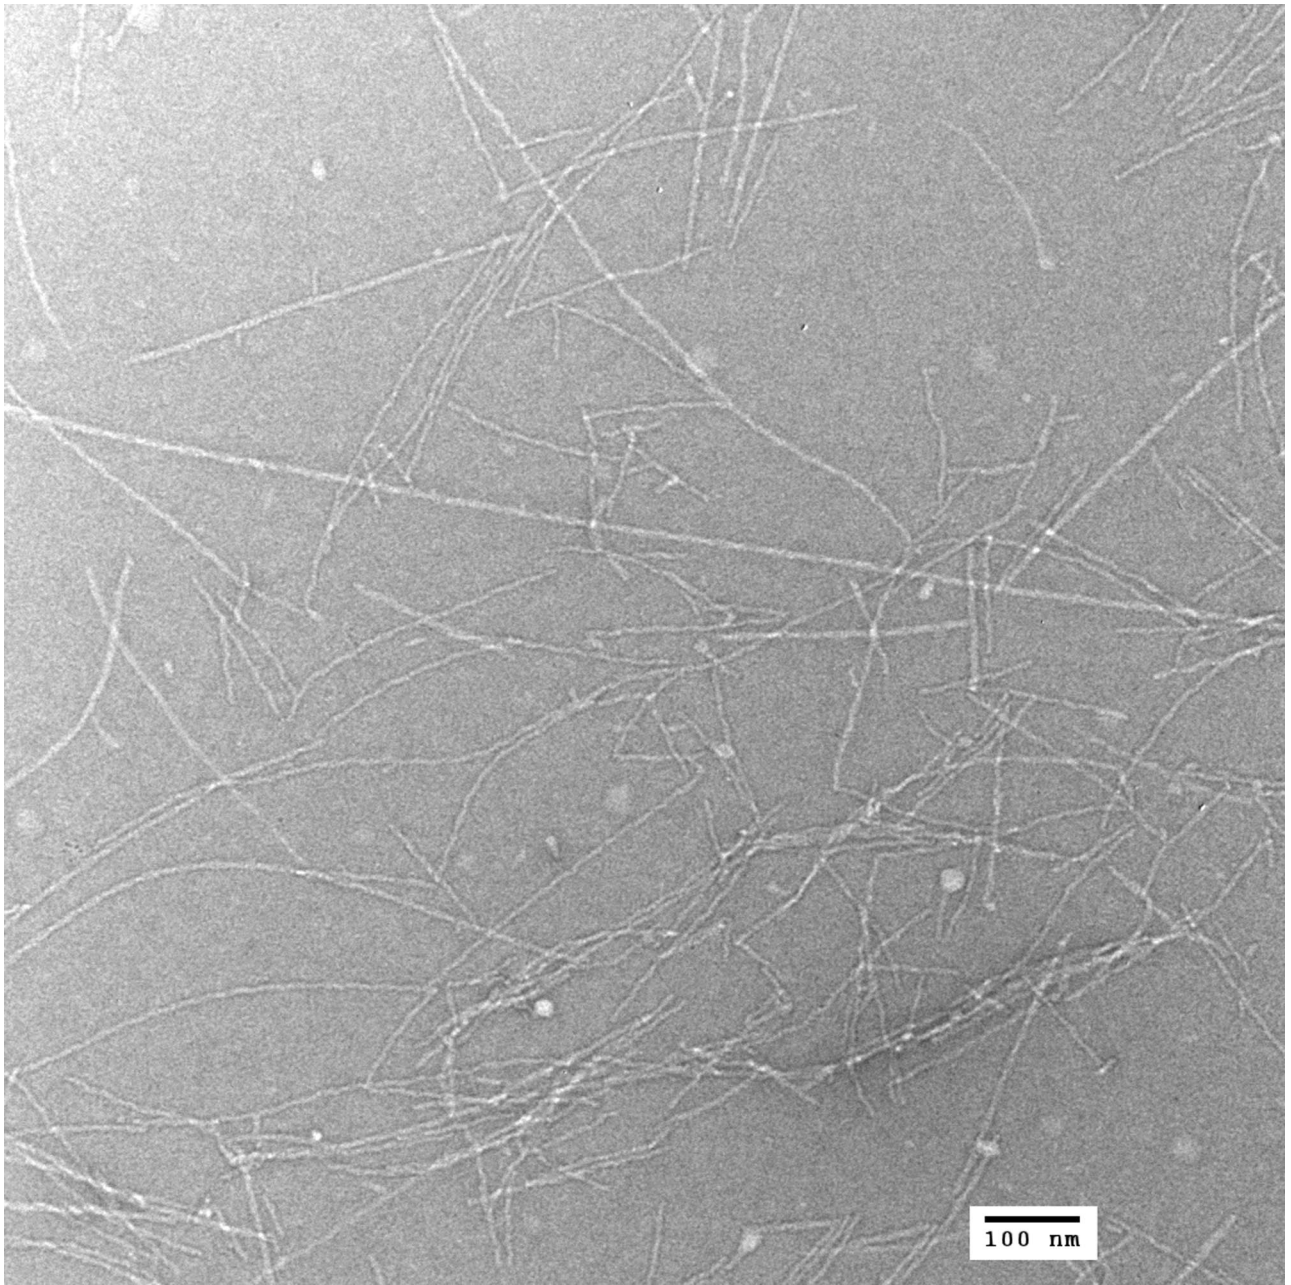

**Fig. S1.** EM image of fibrils formed after 19 days at low pD.



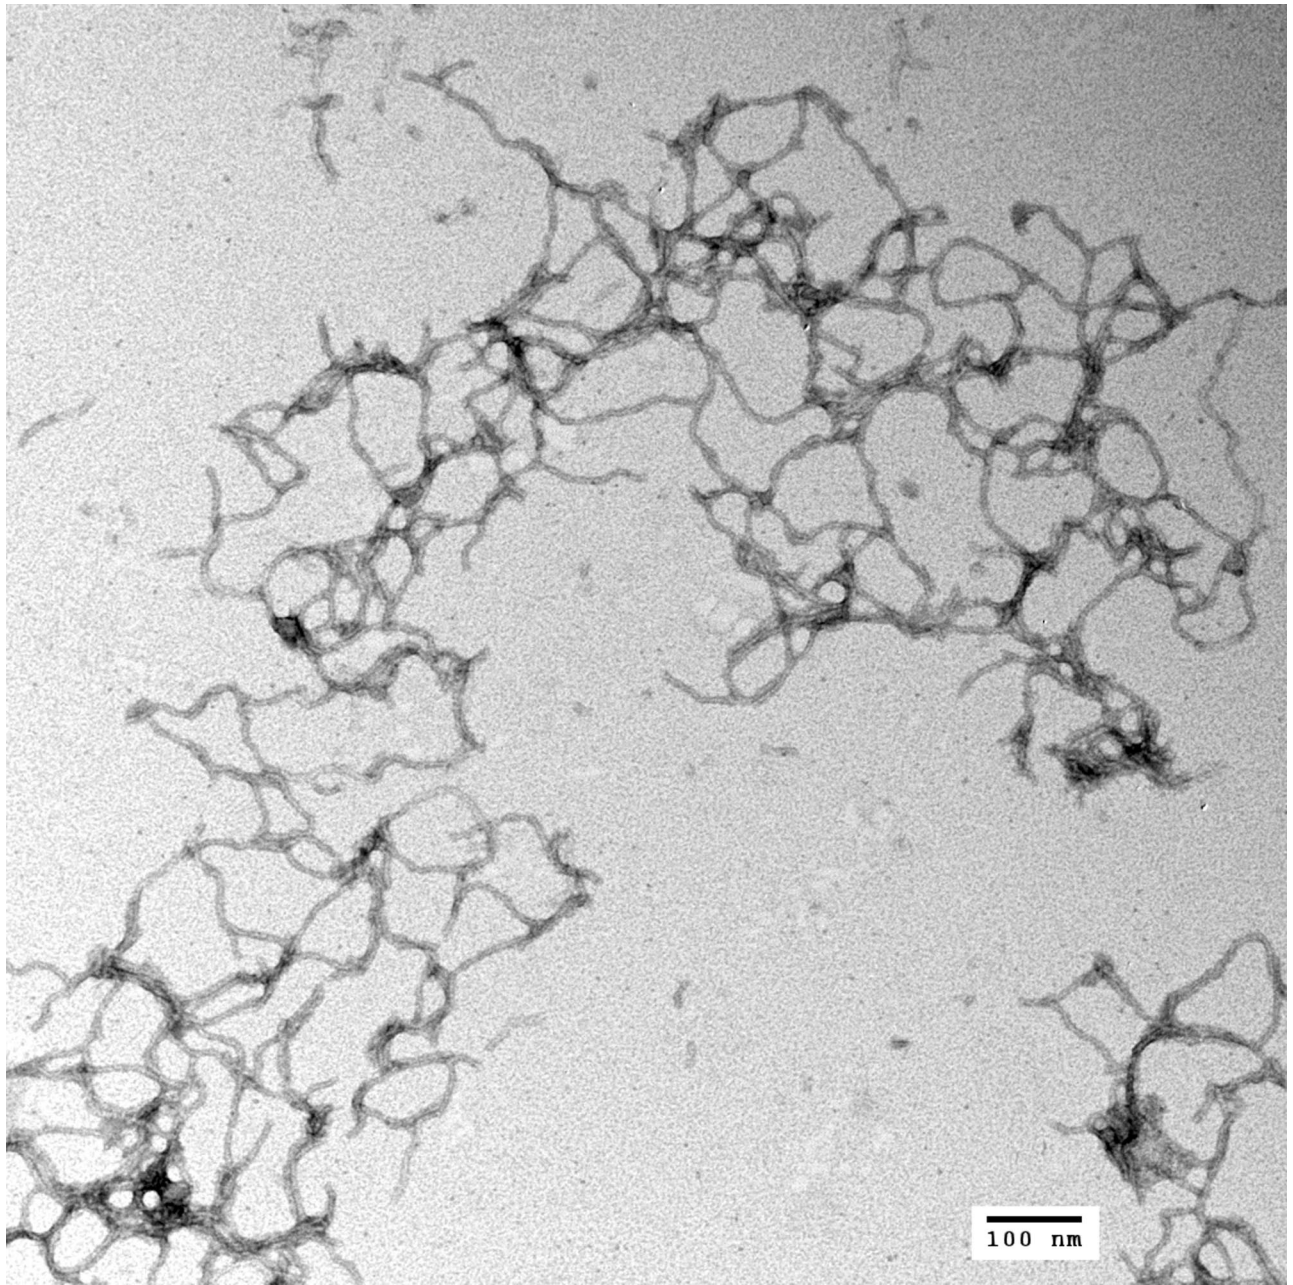

Fig. S2. EM image of fibrils formed after 19 days at neutral pD.
